# Supplementary material
Source: PubMed Central journal article supplement (PMC3236125)
Supplement: supp_blood-2011-08-372508_TableS1.pdf [file supp_blood-2011-08-372508_TableS1.pdf]

| Author                  | N   | Conditioning | stem cell source | Nucleated Cell dose $\times 10^7/\text{kg}$ (range) | % 4/6 or less matched* | median age | median weight | Median days to neutrophil recovery | Median time to plt recovery |
|-------------------------|-----|--------------|------------------|-----------------------------------------------------|------------------------|------------|---------------|------------------------------------|-----------------------------|
| Liu (this paper)        | 45  | RIC          | Haplo cord       | 1.5 (1.2–2)                                         | 20%                    | 50         | 80            | 11                                 | 19                          |
| Bautista <sup>28</sup>  | 55  | ABL          | Haplo cord       | 2.4 (1.1–4.3)                                       | NS                     | 34         | 70            | 10                                 | 32                          |
| Sanz <sup>34</sup>      | 49  | ABL          | SUCB             | 2.2 (1.0–4.4)                                       | 53%                    | 34         | 71            | 20                                 | 62                          |
| Brunstein <sup>44</sup> | 50  | RIC          | DUCB             | 4.2 (2.3–13.6)                                      | 66%                    | 58         | 79            | 15                                 | 38                          |
| Cutler <sup>32</sup>    | 32  | RIC          | DUCB             | 5.1 (3.7–7.6)                                       | 90%                    | 53         | 76            | 21                                 | 42                          |
| Ballen <sup>33</sup>    | 21  | RIC          | DUCB             | 3.7                                                 | 90%                    | 49         | 78            | 20                                 | 41                          |
| Brunstein <sup>31</sup> | 110 | RIC          | DUCB             | 3.7(1.5–6.)                                         | 95%                    | 51         | 76            | 12                                 | 49                          |
| Barker <sup>40</sup>    | 84  | ABL +RIC     | DUCB             | >3                                                  | 40%                    | 36         | 68            | 23 ABL<br>9-RIC                    | NS                          |
| Delaney <sup>8</sup>    | 10  | ABL          | Expanded UCB     |                                                     | 70%                    | 27         | 61            | 16                                 | NS                          |
| de Lima <sup>7</sup>    | 10  | RIC          | Expanded UCB     |                                                     | 90%                    | 20         | 67            | 30                                 | 48                          |

RIC=Reduced intensity conditioning. ABL: Myeloablative conditioning. SUCB: Single Umbilical Cord Blood. DUCB: Double Umbilical Cord Blood.

\*For DUCB, the UCB unit with the lowest degree of matching is taken into account.

NS: not specified
